# Supplementary material
Source: HighWire-hosted journal article supplement (https://rapm.bmj.com/highwire/filestream/15512/field_highwire_adjunct_files/1/rapm-2021-102705supp002_data_supplement.pdf)

## Appendix B - Study Flow Diagram

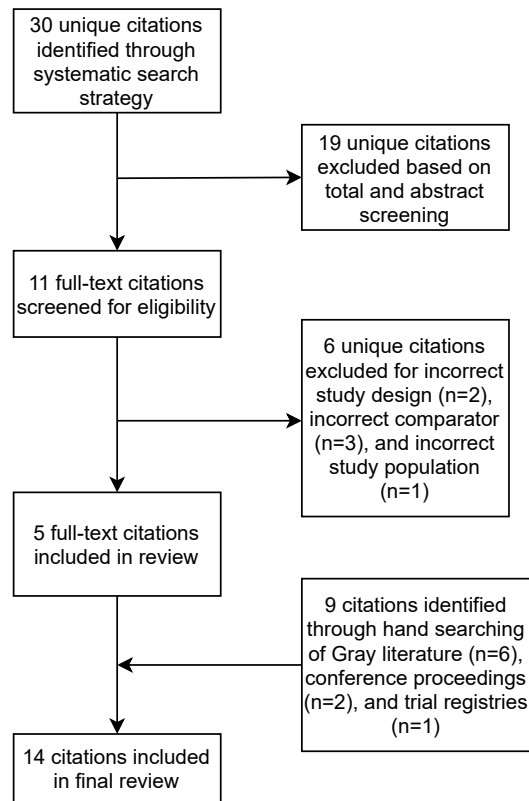

Supplement: rapm-2021-102705supp002_data_supplement.pdf [file rapm-2021-102705supp002_data_supplement.pdf]
